## Recent Books

*Manuscripts of the Latin Classics 800–1200*. Ed. by ERIC KWAKKEL. Leiden: Leiden University Press. 2015. 224 pp. €39.50. ISBN 978 90 8728 226 4.

Another compact title in the series *Studies in Medieval and Renaissance Book Culture* from Leiden, this collection of essays explores the production and use of medieval manuscripts containing classical Latin texts. Includes: E. Kwakkel, 'Manuscripts of the Latin Classics 800–1200: An Introduction'; M. Teeuwen, 'Carolingian Scholarship on Classical Authors: Practices of Reading and Writing'; R. G. Babcock, 'The Transmission of Tibullus in the Tenth and Eleventh Centuries'; I. O'Daly, 'Diagrams of Knowledge and Rhetoric in Manuscripts of Cicero's *De Inventione*'; E. Kwakkel, 'Classics on Scraps: Classical Manuscripts Made from Parchment Waste'; D. T. Gura, 'Living with Ovid: The Founding of Arnulf of Orléans' Thebes'.

*Reading and the Victorians*. Ed. by MATTHEW BRADLEY and JULIET JOHN. Farnham: Ashgate. 2015. 180 pp. £60. ISBN 978 1 4094 4080 2.

Includes: Part I, The Public Aspects of Private Reading: S. Eliot, 'Reading by artificial light in the Victorian age'; S. Colclough, 'New innovations in audience control: the select library and sensation'; B. Palmer, 'Reading Langham Place periodicals at number 19'. Part II, The Reading Relationship: P. Davis, 'Deep reading in the manuscripts: Dickens and the manuscript of David Copperfield'; C. Delafield, "'Telling all": Reading women's diaries in the 1890s'; S. Cordner, 'Reading across the lines and off the page: Dickens's model of multiple literacies in *Our Mutual Friend*'. Part III, Reading the Victorians Today: K. E. Attar, 'Victorian readers and their library records today'; R. Crone, 'Query: Victorian reading'; M. Bradley, 'Gladstone's unfinished synchrony: reading afterlives and the Gladstone database'; C. Ellis, 'The sharing of stories, in company with Mr Dickens'.

*Private Libraries in Renaissance England: A Collection and Catalogue of Tudor and Early Stuart Book-Lists, Vol. VIII*, PLRE 167–260. Ed. by JOSEPH L. BLACK. (Medieval and Renaissance Texts and Studies, 455.) Tempe, Arizona: Arizona Center for Medieval and Renaissance Studies. 2014. xx + 468 pp. \$70. ISBN 978 0 86698 506 2.

The latest volume in the ongoing editorial project, the lists included here expand the geographical and social range of book owners, moving away from Oxford and into the provinces. Forty seven lists are taken from probate inventories compiled between 1580 and 1603 in Norfolk and Suffolk. They represent a wide social range, from blacksmith and grocer to scrivener and estate landowner. The other large section in the volume comprises forty four lists from Catholic men and women. They derive from two sources—lists of confiscated books found in the chambers of the London prisons and the Winchester jail, owned by those incarcerated for holding to the old faith, and inventories of seized books discovered during raids of houses of suspected recusants throughout England. There is also an extensive introductory essay on Catholic libraries of the period by Alexandra Walsham and Earle Havens.

## GERMANY

*Das handschriftliche Erbe der griechischen Welt. Ein europäisches Netzwerk. Vorträge des internationalen Symposiums 'Griechische Handschriften in der Bayerischen Staatsbibliothek' am 5. März 2013 und weitere Beiträge zur aktuellen Erschließung und Erforschung.* Ed. by CLAUDIA FABIAN. (Bibliothek und Wissenschaft, 47.) Wiesbaden: Harrassowitz. 2014. vi + 195 pp. €99. ISBN 978 3 447 10305 3.

Includes: P. Schreiner, 'Geschichte der griechischen Handschriftenkatalogisierung: Ein Überblick'; C. Fabian, 'Die Codices graeci Monacenses: Ein Überblick über den Bestand und seine Erschließung'; M. Molin Pradel, 'Die Codices graeci 56 bis 109: Zum zweiten Band des Katalogs der griechischen Handschriften der Bayerischen Staatsbibliothek'; K. Hajdú, 'Die Codices graeci 181 bis 265: Zum vierten Band des Katalogs der griechischen Handschriften der Bayerischen Staatsbibliothek'; A. Benaki, 'Die Förderung der Katalogisierung des Supplementbestands durch die Stiftung des Hellenischen Parlaments'; F. Berger, 'Der Supplementbestand (Codices graeci 575 bis 650): Zum neunten Band des Katalogs der griechischen Handschriften der Bayerischen Staatsbibliothek'; L. Perrone, 'Der Origenes-Fund der Bayerischen Staatsbibliothek: Die 29 Psalmenhomilien von Cod.graec. 314'; U. Bauer-Eberhardt, 'Eine griechische Handschrift aus Florenz und ihr Buchmaler Attavante: Der Cod.graec. 151 der Bayerischen Staatsbibliothek'; P. Schreiner, 'Der Handschriftenkatalog und die wissenschaftliche Forschung am Beginn des 21. Jahrhunderts: Drei Beispiele zur Tiefenerschließung aus dem Bestand der Bayerischen Staatsbibliothek'; K. Heydeck, 'Die griechischen Handschriften in der Staatsbibliothek zu Berlin'; F. Berger, 'Universitäre Gelehrsamkeit und patrizischer Sammeleifer: Griechische Handschriften in Leipzig'; D. Mertzanis and C. Sode, 'Vom Balkan bis Zypern: Die unbekanntesten griechischen Handschriften der Herzogin Anna Amalia Bibliothek Weimar'; E. Gamillscheg, 'Die Erforschung spezieller Handschriftenbestände an der Österreichischen Nationalbibliothek (am Beispiel der Codices Vindobonenses graeci).'

*Die Urkunde in der Karolingerzeit. Originale, Urkundenpraxis und politische Kommunikation.* By MARK MERSIOWSKY. (Monumenta Germaniae Historica. Schriften, 60.) Wiesbaden: Harrassowitz. 2015. cvi + 1114 pp. €148. ISBN 978 3 447 10079 3.

A major contribution to diplomatology, dealing with the characteristics and function of charters and other documents produced throughout the Carolingian period by kings, prelates and nobility, with an extensive study of contemporary archival practice.

*Rechtshandschriften des deutschen Mittelalters. Produktionswege und Importwege.* Ed. by PATRIZIA CARMASSI and GISELA DROSSBACH. (Wolfenbütteler Mittelalter-Studien, 29.) Wiesbaden: Harrassowitz. 2015. 416 pp. + 20 colour and 43 monochrome illus. €98. ISBN 978 3 447 10293 3.

A useful volume presenting the proceedings of a conference devoted to the production, importation and use made of law manuscripts in the Middle Ages in Germany. Much of the discussion is based on manuscripts from the cathedral library at Halberstadt, now preserved in the University Library at Halle.

*Gutenberg und 'sine frunde'. Studien zu patrizischen Familien im spätmittelalterlichen Mainz.* By HEIDRUN OCHS. (Geschichtliche Landeskunde, 71.) Stuttgart: Franz Steiner Verlag. 2014. 566 pp. + 17 illus. €79. ISBN 978 3 515 10934 5.

In a detailed study of the patrician class of Mainz, based on an examination of what is known of 471 individuals recorded in the city between the mid-thirteenth century and 1462, Heidrun Ochs seeks to characterise the distinctive features of the class, and

thus contributes to an understanding of the social and political background that helped shape the career of Johann Gutenberg.

*Scraps of Thought: Margin Notes in Old Romanian Books.* By MARIANA BORCOMAN. (Europäische Hochschulschriften, 1095.) Frankfurt am Main etc.: Peter Lang. 2015. 119 pp. £21. ISBN 978 3 631 66046 1.

A study of marginalia written in medieval books from the archive of the school at Braşov in Romania, which enjoyed the support of local merchants, craftsmen and other wealthy people. Their notes shows how the books afford insights into life, events and human emotions of long ago.

*London*

JOHN L. FLOOD
